# Supplementary material for: Application of Marte Meo® counselling with people with behavioural variant frontotemporal dementia and their primary carers (AMEO-FTD) – a non-randomized mixed-method feasibility study
Source: Pilot Feasibility Stud. 2020 Feb 26;6:32. doi: 10.1186/s40814-020-0551-1 (PMC7043032; doi:10.1186/s40814-020-0551-1)
Supplement: Supplementary file 3 — Table S3. Summaries of the main themes and subthemes resulting from the qualitative structured content analysis of the interviews with the Marte Meo® therapist. [file 40814_2020_551_MOESM3_ESM.xlsx]

## Sheet: Sheet1
Main themes	Subthemes	Summary
Quality of the implementation of the intervention	Overall experience of the counselling	In general, the MM therapist experienced the counselling of the target group to be similar to other MM counselling with other target groups, although the MM therapist experienced some pressure from the counselling assignment.
	Typical and special characteristics of the counselling	Typical of MM counselling, the counselling was not problem-focused, and the FSEs also seemed to be applicable for this target group. Even though the counselling sessions did not differ fundamentally from other counselling sessions in other contexts, there were nevertheless special characteristics. For example, a counselling video was used for two sessions, while other counselling sessions were co…
	Optimization potential	Overall, the MM therapist thought that she did not take enough breaks in the counselling process and that she should have focused more on the Marte Meo® element of “Recognizing and following initiatives of the relative with bvFTD”. In addition, she was not always able to integrate all family members into the counselling process.
	Implementation	Overall, the intervention was implemented as planned. Essentially, the counselling sessions were classic MM counselling, as the counselling approach was focused on the needs and resources of the person with bvFTD. In addition, the scenes for the counselling videos were selected according to this approach, and the counselling focused on FSEs and provided information on the impact of the FSEs. The …
	Organization of the counselling's	Overall, the organization of the counselling sessions worked very well. Sometimes, joint counselling of the dyads was difficult because the therapist and the carer talked about the person with bvFTD in his/her presence. One time, it was difficult to record the counselling video because of the confined living conditions of the dyad; in general, the counselling videos were mostly recorded on site a…
Changes	Perceived changes	The following changes were perceived by the MM therapist in the dyads during the counselling process: more commitment, linguistic utterances, and expressions of happiness of the relative with bvFTD; less challenging behaviours of persons with bvFTD; more joint activities; improved understanding of the needs of the person with bvFTD and less talking about him/her in his/her presence; more consciou…
	Promoting and inhibiting factors (affordances and hindrances)	Regarding benefits for the counselling process, the MM therapist experienced the openness of the primary carer to trying something new, the ability to reflect on his/her own behaviour, and the acceptance of the illness of the person with bvFTD. In contrast, inhibiting factors for the process would include the diagnosis or illness not being accepted yet by the primary carer; the primary carer bein…
	Impact mechanisms	The images of and information about already successful communication behaviours in the counselling videos helped remind carers of other situations in everyday life and thereby strengthen their implementation. Picture cards for the individual FSEs, provided by the MM therapist, helped primary carers maintain behavioural changes.
	Appropriate dose of intervention	The MM therapist reported that the number of sessions was sufficient in principle but is not enough to address specific content in-depth. Some follow-up sessions after a break following the first five sessions would be desirable. She also advocated a several-week or two-week schedule so the content could be implemented in everyday life.
MM = Marte Meo®
